# Supplementary material for: Impact of Pain Neuroscience Education Program in Community Physiotherapy Context on Pain Perception and Psychosocial Variables Associated with It in Elderly Persons: A Ranzomized Controlled Trial
Source: MDPI journal article supplement (doi:10.3390/ijerph191911855), 2022-09-20
Supplement: s1 [file s1]

| WEEK /<br>SESSION | MAIN TOPIC                                                        | CONTENTS                                                                                                                                                                                                                                                                    | GOALS                                                                                                                                                                                                                                                                                            | REINFORCEMENT                                                                                                                                                                                               | METHODS                                                                                                                                                                                                         | TIME       |
|-------------------|-------------------------------------------------------------------|-----------------------------------------------------------------------------------------------------------------------------------------------------------------------------------------------------------------------------------------------------------------------------|--------------------------------------------------------------------------------------------------------------------------------------------------------------------------------------------------------------------------------------------------------------------------------------------------|-------------------------------------------------------------------------------------------------------------------------------------------------------------------------------------------------------------|-----------------------------------------------------------------------------------------------------------------------------------------------------------------------------------------------------------------|------------|
| 1                 | <b>Acute vs. chronic pain differentiation.</b>                    | <ul style="list-style-type: none"> <li>- Pain definition.</li> <li>- Nervous system as an alarm system.</li> <li>- Nociception vs. pain.</li> <li>- Sensory stimuli: mechanical, thermal, and chemical.</li> <li>- Differences between acute and chronic pain.</li> </ul>   | <ul style="list-style-type: none"> <li>- Exploring patient beliefs about pain.</li> <li>- First approach to nervous system knowledge.</li> <li>- Understanding pain as an alarm system.</li> <li>- Demystify chronic pain.</li> <li>- Self-questioning of pain beliefs and behaviors.</li> </ul> | <ul style="list-style-type: none"> <li>- Pain as an alarm system.</li> <li>- Chronic pain does not mean forever.</li> <li>- Introspection about personal beliefs and pain.</li> </ul>                       |                                                                                                                                                                                                                 | 60 minutes |
| 2                 | <b>Acute pain physiology.</b>                                     | <ul style="list-style-type: none"> <li>- Nociception process: stimuli transduction, transmission, and modulation</li> <li>- Top-down inhibitory systems</li> <li>- The relevance in motion and behavioral</li> <li>- Relationship between pain and tissue damage</li> </ul> | <ul style="list-style-type: none"> <li>- Learn about how a stimulus can produce nociception.</li> <li>- Understand how nociception can be modulated by nervous system.</li> <li>- Think about pain and movement.</li> </ul>                                                                      | <ul style="list-style-type: none"> <li>- Nociception and pain are not the same.</li> <li>- Pain is rarely related to tissue damage.</li> </ul>                                                              | <ul style="list-style-type: none"> <li>- Metaphors</li> <li>- Drawings and diagrams made by the researcher.</li> <li>- Illustrations, definitions and diagrams extracted from <i>"Explain Pain"</i>.</li> </ul> | 60 minutes |
| 3                 | <b>Pain chronification processes I: peripheral sensitization.</b> | <ul style="list-style-type: none"> <li>- Introduction to sensitization.</li> <li>- Hyperexcitability of nociceptive pathways.</li> <li>- Hyperalgesia</li> <li>- Peripheral sensitization as an adaptive protective process.</li> </ul>                                     | <ul style="list-style-type: none"> <li>- Understanding the plasticity of the nervous system.</li> <li>- Why certain areas may be more reactive to nociception.</li> <li>- Learning about inflammation and pain.</li> </ul>                                                                       | <ul style="list-style-type: none"> <li>- The same stimulus can be more painful in the presence of sensitization.</li> <li>- Peripheral sensitization and hyperalgesia are protective mechanisms.</li> </ul> |                                                                                                                                                                                                                 | 60 minutes |

| WEEK /<br>SESSION | MAIN TOPIC                                                            | CONTENTS                                                                                                                                                                                                                                                                                | GOALS                                                                                                                                                                                                                                                                                                                                                                                             | REINFORCEMENT                                                                                                                                                                                                                                                                                         | TIME       |
|-------------------|-----------------------------------------------------------------------|-----------------------------------------------------------------------------------------------------------------------------------------------------------------------------------------------------------------------------------------------------------------------------------------|---------------------------------------------------------------------------------------------------------------------------------------------------------------------------------------------------------------------------------------------------------------------------------------------------------------------------------------------------------------------------------------------------|-------------------------------------------------------------------------------------------------------------------------------------------------------------------------------------------------------------------------------------------------------------------------------------------------------|------------|
| 4                 | <b>Pain Chronification Processes II: central sensitization.</b>       | <ul style="list-style-type: none"> <li>- Top-down inhibitory systems.</li> <li>- Wind-up phenomenon and long-term potentiation.</li> <li>- Allodynia and hyperalgesia concepts.</li> <li>- Maladaptive consequences.</li> </ul>                                                         | <ul style="list-style-type: none"> <li>- Learn the role of the central nervous system in pain modulation.</li> <li>- Learn to identify the role and signs of allodynia and hyperalgesia.</li> </ul>                                                                                                                                                                                               | <ul style="list-style-type: none"> <li>- Decreased descending inhibition may cause more pain in the absence of tissue damage.</li> <li>- In presence of allodynia, non-painful stimuli can pro pain</li> </ul>                                                                                        | 60 minutes |
| 5                 | <b>Chronic Pain Neurophysiology: Neuromatrix theory.</b>              | <ul style="list-style-type: none"> <li>- Neuromatrix</li> <li>- Role of the limbic system on pain.</li> <li>- Pain pathways on brain.</li> <li>- First approach to cognitive and emotional parts of pain.</li> </ul>                                                                    | <ul style="list-style-type: none"> <li>- Understand individual and subjective features of pain.</li> <li>- Identify the different pathways of pain in the brain.</li> <li>- Understand the role of limbic system on pain.</li> </ul> <p>Think about threat perception and limbic system responses.</p>                                                                                            | <ul style="list-style-type: none"> <li>- Pain does not occur on tissues.</li> </ul>                                                                                                                                                                                                                   | 60 minutes |
| 6                 | <b>Pain Dimensions: emotional, psychological, and social factors.</b> | <ul style="list-style-type: none"> <li>- Experience, beliefs and emotions on pain perception.</li> <li>- Protectometer</li> <li>- Context influence.</li> <li>- Maladaptive behaviors on pain.</li> <li>- Fear-avoidance, hypervigilance, catastrophizing and kinesiophobia.</li> </ul> | <ul style="list-style-type: none"> <li>- Think about personal experiences and injury.</li> <li>- Understand the influence of context and emotions on perceived pain.</li> <li>- Think about personal behaviors that can be perpetuating pain.</li> <li>- Design and learn strategies of self-efficacy on pain.</li> <li>- Understand the role of attention and hypervigilance on pain.</li> </ul> | <ul style="list-style-type: none"> <li>- Emotions, beliefs, and context are part of pain experience.</li> <li>- Maladaptive behaviors related to pain must be identified.</li> <li>- Self-efficacy on pain.</li> <li>- Concepts related to movement and pain and fear-avoidance behaviors.</li> </ul> | 60 minutes |
